# Supplementary material for: Taxonomic, phylogenetic and functional diversity of an urban Amazonian avifauna
Source: Springer Nature journal article supplement (doi:10.1007/s11252-017-0661-6), 2017-04-04
Supplement: MOESM1 [file 12198936]

**SUPPORTING INFORMATION**

Additional Supporting Information may be found in the online version of this article:


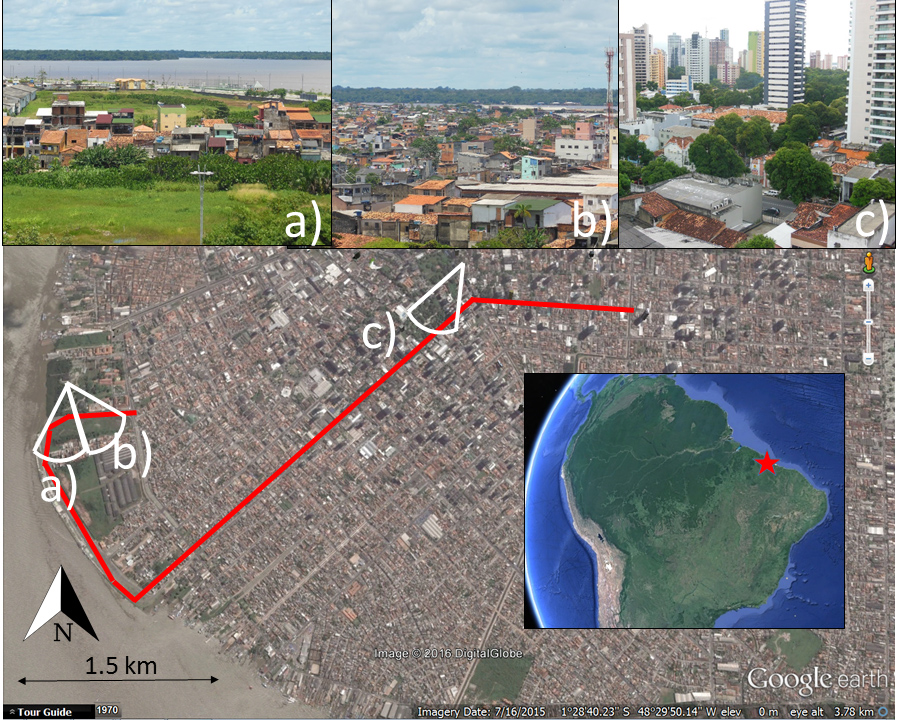


**SOM Figure 1.** Map of the study area showing the transect marked in red and images highlight representative habitat types representing viewsheds a, b & c marked on the map (satellite imagery copyright Google Earth).
