# Supplementary material for: Taxonomic, phylogenetic and functional diversity of an urban Amazonian avifauna
Source: Springer Nature journal article supplement (doi:10.1007/s11252-017-0661-6), 2017-04-04
Supplement: MOESM2 [file 12198936]

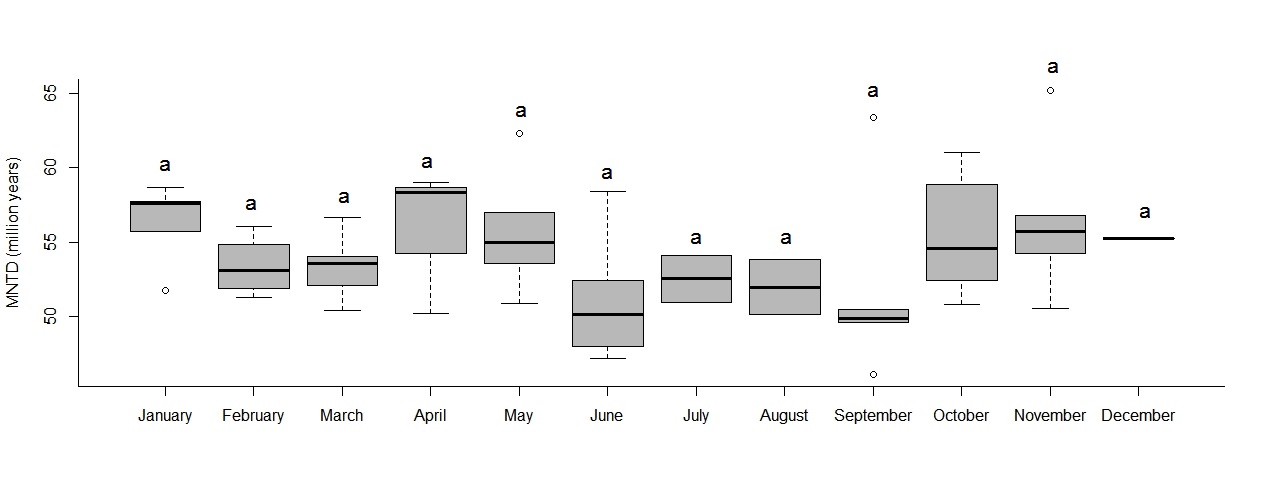


**SOM Figure 2.** Mean nearest taxon distance through the annual cycle. Non-significant pairwise differences between months are indicated by the presence of the same letter.
